# Supplementary material
Source: MDPI journal article supplement (https://www.mdpi.com/2311-5637/8/8/395)
Supplement: s1 [file s1]

Table S1. Results table of an example of CCD1 protein detection by LCMS, *Petunia x hybrida* PhCCD1 with MW 61.3 kDa, line 6731

| #    | Checked | Master    | Accession  | Description                                                 | Cove# | Pes# | PSI# | Un# | AA   | MW   | calc. | Score# | Pes Biological | Cellular C           | Molecular Pfam IDs    | Entrez Ge          | Ensembl        | C Gene Sym            | Chro                               | KEGG Pat                         | WikiPathw | Reactome # | Pro Foun    | Pro     |   |
|------|---------|-----------|------------|-------------------------------------------------------------|-------|------|------|-----|------|------|-------|--------|----------------|----------------------|-----------------------|--------------------|----------------|-----------------------|------------------------------------|----------------------------------|-----------|------------|-------------|---------|---|
| 6470 | FALSE   | Master Pn | Q03558     | NADPH dehydrogenase 2 OS=Saccharomyces cerevisiae (stra     | 34    | 11   | 17   | 11  | 400  | 45   | 6.57  | 476    | 11             | cell death           | cytoplasm catalytic   | a PF00724          | 856584         | YHR179W OYE2          | VIII                               |                                  |           |            | 0 High      | 1       |   |
| 6491 | FALSE   | Master Pn | P38693     | Acid phosphatase PHO12 OS=Saccharomyces cerevisiae (str     | 20    | 10   | 20   | 8   | 467  | 52.7 | 5.16  | 476    | 10             | metabolic vacuole    | catalytic             | a PF00328          | 856625         | YHR215W PHO12         | VIII                               | Metabolic                        |           |            | 2 High      | 1       |   |
| 6515 | FALSE   | Master Pn | P07262     | NADP-specific glutamate dehydrogenase 1 OS=Saccharomyc      | 32    | 11   | 15   | 7   | 454  | 49.5 | 5.69  | 457    | 11             | metabolic cytoplasm  | catalytic             | a PF02008, F854557 | YOR375C GDH1   | XV                    | Arginine b Superpath Amino aci     |                                  |           |            | 12 High     | 1       |   |
| 6534 | FALSE   | Master Pn | P14126     | 60S ribosomal protein L3 OS=Saccharomyces cerevisiae (stra  | 40    | 15   | 17   | 15  | 387  | 43.7 | 10.3  | 456    | 15             | cell organi          | cytoplasm nucleotide  | a PF00297          | 854229         | YOR063W RPL3          | XV                                 | Ribosome Cytoplasm Formator      |           |            | 14 High     | 1       |   |
| 6555 | FALSE   | Master Pn | C7GVZ9     | 40S ribosomal protein S1-B OS=Saccharomyces cerevisiae (st  | 42    | 12   | 14   | 2   | 255  | 28.8 | 10.1  | 456    | 12             | metabolic cytoplasm  | structural            | a PF01015          |                |                       |                                    |                                  |           |            | 0 High      | 1       |   |
| 6573 | FALSE   | Master Pn | P46955     | Beta-glucosidase-like protein NCA3, mitochondrial OS=Sacch  | 21    | 7    | 14   | 6   | 337  | 35.4 | 4.46  | 456    | 7              | cell organi          | cell surfac           | a PF03856          | 853326         | YIL116C NCA3          | X                                  |                                  |           |            | 0 High      | 1       |   |
| 6591 | FALSE   | Master Pn | P41939     | Isocitrate dehydrogenase [NAD(P)] cytoplasmic OS=Saccharon  | 25    | 9    | 14   | 8   | 412  | 46.5 | 6.19  | 454    | 9              | metabolic cytoplasm  | catalytic             | a PF00180          | 850871         | YLR174W IDP2          | XII                                | Carbon m Principle F Citric acid |           |            | 26 High     | 1       |   |
| 6609 | FALSE   | Master Pn | P31539     | Heat shock protein 104 OS=Saccharomyces cerevisiae (strain  | 18    | 13   | 14   | 13  | 908  | 102  | 5.45  | 448    | 13             | cell organi          | cytoplasm catalytic   | a PF00004, F850633 | YLL026W HSP104 | XII                   | Longevity                          |                                  |           |            | 1 High      | 1       |   |
| 6627 | FALSE   | Master Pn | B3RHW0     | 40S ribosomal protein S1-A OS=Saccharomyces cerevisiae (st  | 42    | 12   | 14   | 2   | 255  | 28.7 | 9.99  | 445    | 12             | metabolic cytoplasm  | structural            | a PF01015          |                | SCRG_043              |                                    |                                  |           |            | 0 High      | 1       |   |
| 6645 | FALSE   | Master Pn | P19097     | Fatty acid synthase subunit alpha OS=Saccharomyces cerevis  | 11    | 18   | 18   | 18  | 1887 | 207  | 5.44  | 442    | 18             | metabolic cytoplasm  | catalytic             | a PF00106, F855845 | YPL231W FAS2   | XVI                   | Fatty acid Fatty Acid              |                                  |           |            | 6 High      | 1       |   |
| 6667 | FALSE   | Master Pn | PDCX82     | 60S ribosomal protein L19-A OS=Saccharomyces cerevisiae (   | 26    | 7    | 11   | 7   | 189  | 21.7 | 11.4  | 430    | 7              | cell organi          | cytoplasm RNA bindi   | a PF01280          | 852254; 8      | YBL027W; RPL19B; R II |                                    | Ribosome Cytoplasm Formator      |           |            | 14 High     | 1       |   |
| 6682 | FALSE   | Master Pn | P60010     | Actin OS=Saccharomyces cerevisiae (strain ATCC 204508 / S2  | 30    | 9    | 15   | 3   | 375  | 41.7 | 5.68  | 425    | 9              | cell organi          | cytoplasm catalytic   | a PF00022          | 850504         | YFL039C ACT1          | VI                                 | Phagosome                        |           |            | RHO GTPa    | 10 High | 1 |
| 6701 | FALSE   | Master Pn | P47143     | Adenosine kinase OS=Saccharomyces cerevisiae (strain ATCC   | 40    | 9    | 13   | 9   | 340  | 36.4 | 5.16  | 425    | 9              | metabolic cytoplasm  | catalytic             | a PF00294          | 853569         | YIR105W ADO1          | X                                  | Metabolic                        |           |            | Purine sal  | 6 High  | 1 |
| 6718 | FALSE   | Master Pn | P36110     | Protein PRY2 OS=Saccharomyces cerevisiae (strain ATCC 204   | 13    | 3    | 9    | 3   | 329  | 33.8 | 4.6   | 420    | 3              | transport            | endoplasm             | a PF00188          | 853882         | YKR013W PRY2          | XI                                 |                                  |           |            |             | 0 High  | 1 |
| 6731 | FALSE   | Master Pn | JT_Ph_CCD1 | Petunia x hybrida carotenoid cleavage dioxygenase 1 (CCD1)  | 24    | 10   | 12   | 10  | 546  | 61.3 | 6.27  | 420    | 10             |                      |                       |                    |                |                       |                                    |                                  |           |            | 0 High      | 1       |   |
| 6747 | FALSE   | Master Pn | P54070     | Mannosyltransferase KTR6 OS=Saccharomyces cerevisiae (st    | 28    | 11   | 13   | 11  | 446  | 52.1 | 5.5   | 417    | 11             | cell organi          | Golgi;men catalytic   | a PF01793          | 856054         | YPL053C KTR6          | XVI                                | Metabolic                        |           |            |             | 2 High  | 1 |
| 6764 | FALSE   | Master Pn | P23254     | Transketolase 1 OS=Saccharomyces cerevisiae (strain ATCC 2  | 22    | 13   | 17   | 13  | 680  | 73.8 | 7.01  | 413    | 13             | metabolic cytoplasm  | catalytic             | a PF00456, F856188 | YMR074C TKL1   | XVI                   | Pentose p Principle F Pentose p    |                                  |           |            |             | 18 High | 1 |
| 6785 | FALSE   | Master Pn | P00729     | Carboxypeptidase Y OS=Saccharomyces cerevisiae (strain AT   | 20    | 10   | 15   | 10  | 532  | 59.8 | 4.73  | 412    | 10             | metabolic cytoplasm  | catalytic             | a PF00450, F855343 | YMR297W PC1    | XIII                  |                                    |                                  |           |            | Neutrophil  | 3 High  | 1 |
| 6804 | FALSE   | Master Pn | P37291     | Serine hydroxymethyltransferase, cytosolic OS=Saccharomyc   | 32    | 14   | 14   | 13  | 469  | 52.2 | 7.43  | 386    | 14             | metabolic cytoplasm  | catalytic             | a PF00155, F850747 | YLR058C SHM2   | XII                   | Cyanoami Pathways                  |                                  |           |            | Carnitine : | 22 High | 1 |
| 6822 | FALSE   | Master Pn | P13130     | Sporelation-specific wall maturation protein OS=Saccharomyl | 14    | 3    | 6    | 3   | 326  | 34.2 | 5.41  | 385    | 3              | cell differe         | catalytic             | a PF00710          | 856541         | YHR139C SPS100        | VIII                               |                                  |           |            |             | 0 High  | 1 |
| 6832 | FALSE   | Master Pn | P38887     | Uncharacterized protein YHR202W OS=Saccharomyces cerev      | 22    | 13   | 18   | 13  | 602  | 69   | 6.23  | 381    | 13             | metabolic cytosol;va | catalytic             | a PF00149          | 856609         | YHR202W YHR202W       | VIII                               |                                  |           |            |             | 0 High  | 1 |
| 6854 | FALSE   | Master Pn | P15992     | Heat shock protein 26 OS=Saccharomyces cerevisiae (strain   | 58    | 9    | 13   | 9   | 214  | 23.9 | 5.53  | 378    | 9              | metabolic cytoplasm  | protein bli           | a PF00011          | 852364         | YBR072W HSP26         | II                                 | Protein pr                       |           |            |             | 1 High  | 1 |
| 6871 | FALSE   | Master Pn | P38109     | Putative serine carboxypeptidase YBR139W OS=Saccharomyc     | 20    | 9    | 15   | 9   | 508  | 57.6 | 5.31  | 376    | 9              | metabolic vacuole    | catalytic             | a PF00450          | 852436         | YBR139W YBR139W       | II                                 |                                  |           |            | Neutrophil  | 3 High  | 1 |
| 6890 | FALSE   | Master Pn | P53090     | Aromatic/aminoadipate aminotransferase 1 OS=Saccharomyc     | 24    | 11   | 12   | 11  | 500  | 56.1 | 6.01  | 373    | 11             | metabolic cytoplasm  | catalytic             | a PF00155, F856272 | YGL201W ARO8   | VII                   | Lysine bio; Phenylala; Lysine cati |                                  |           |            | 23 High     | 1       |   |
| 6906 | FALSE   | Master Pn | P00817     | Inorganic pyrophosphatase OS=Saccharomyces cerevisiae (st   | 48    | 9    | 13   | 9   | 287  | 32.3 | 5.58  | 372    | 9              | metabolic cytoplasm  | catalytic             | a PF00719          | 852296         | YBR011C IPP1          | II                                 | Oxidative UDP-Glucx Cytosolic i  |           |            |             | 9 High  | 1 |
| 6923 | FALSE   | Master Pn | Q08271     | 1,3-beta-glucanosyltransferase GAS4 OS=Saccharomyces cer    | 18    | 7    | 12   | 7   | 471  | 53.8 | 4.89  | 370    | 7              | cell organi          | membran catalytic     | a PF00150, F853988 | YOL132W GAS4   | XV                    |                                    |                                  |           |            | 0 High      | 1       |   |
| 6939 | FALSE   | Master Pn | P06168     | Ketol-acyl reductoisomerase, mitochondrial OS=Saccharomyc   | 30    | 9    | 12   | 9   | 395  | 44.3 | 9.04  | 368    | 9              | cell organi          | mitochondri catalytic | a PF01450, F851069 | YLR355C ILV5   | XII                   | Metabolic Isoleucine               |                                  |           |            |             | 10 High | 1 |
| 6955 | FALSE   | Master Pn | P36105     | 60S ribosomal protein L14-A OS=Saccharomyces cerevisiae (   | 52    | 10   | 12   | 10  | 138  | 15.2 | 10.9  | 365    | 10             | cell comm cytoplasm  | nucleotide            | a PF01929          | 853864         | YKL006W RPL14A        | XI                                 | Ribosome Cytoplasm               |           |            |             | 2 High  | 1 |

Table S2. Results table indicating no detection by LCMS of any CCD1 protein secreted from the empty plasmid (p\_Empty) between the range of CCD1 sizes used: MW 61.1 kDa – 62.4 kDa

| #     | Checked | Master     | Accession | Description                                               | Cover | Per # | PSI # | Un # | AA  | MW   | calc. | score | Per Biological | Cellular C   | Molecular P | Path IDs      | Entrez Ge          | Ensembl  | C Gene   | Sym  | Chro       | KEGG     | Path       | WikiPath     | Reactome    | #  | Pro  | Four | # | Pro |  |
|-------|---------|------------|-----------|-----------------------------------------------------------|-------|-------|-------|------|-----|------|-------|-------|----------------|--------------|-------------|---------------|--------------------|----------|----------|------|------------|----------|------------|--------------|-------------|----|------|------|---|-----|--|
| 12170 | FALSE   | Master Pri | P33734    | Imidazole glycerol phosphate synthase hisHf OS=Saccharo   | 9     | 5     | 6     | 5    | 552 | 61.3 | 5.49  | 126   | 5              | metabolic    | cytoplasm   | catalytic     | a Pf00117, i852550 | YBR248C  | HIS7     | II   |            |          |            | Histidine r  | Histidine f | 5  | High | 1    |   |     |  |
| 12176 | FALSE   | Master Pri | Q08224    | Hydroxymethylpyrimidine/phosphomethylpyrimidine kina      | 3     | 2     | 2     | 2    | 551 | 61.2 | 6.16  | 59    | 2              | metabolic    | cytosol     | catalytic     | a Pf05048, i854099 | YOL055C  | THI20    | XV   |            |          |            | Metabolic    |             | 2  | High | 1    |   |     |  |
| 12181 | FALSE   | Master Pri | P12709    | Glucose-6-phosphate isomerase OS=Saccharomyces cerev      | 57    | 26    | 61    | 26   | 554 | 61.3 | 6.46  | 1868  | 26             | metabolic    | cytoplasm   | catalytic     | a Pf00342, i852495 | YBR196C  | PGI1     | II   | Glucoseo   |          |            | Pentose p    | Principle f | 25 | High | 1    |   |     |  |
| 12186 | FALSE   | Master Pri | P06169    | Pyruvate decarboxylase isozyme 1 OS=Saccharomyces ceri    | 54    | 24    | 77    | 21   | 563 | 61.5 | 6.19  | 2776  | 24             | metabolic    | cytoplasm   | catalytic     | a Pf00205, i850733 | YLR044C  | PDG1     | XII  |            |          |            | Glycolysis   | Principle f | 9  | High |      |   |     |  |
| 12193 | FALSE   | Master Pri | P26263    | Pyruvate decarboxylase isozyme 3 OS=Saccharomyces ceri    | 12    | 4     | 22    | 1    | 563 | 61.5 | 6.19  | 771   | 4              | metabolic    | cytoplasm   | catalytic     | a Pf00205, i852978 | YGR087C  | PCDC     | VII  |            |          |            | Glycolysis   | Principle f | 9  | High | 1    |   |     |  |
| 12199 | FALSE   | Master Pri | P47079    | T-complex protein 1 subunit theta OS=Saccharomyces cere   | 7     | 4     | 4     | 4    | 568 | 61.6 | 5.72  | 70    | 4              | metabolic    | cytoplasm   | nucleotide    | Pf00118, i853447   | YJL008C  | CCT8     | X    | Cooperati  |          |            |              |             | 8  | High | 1    |   |     |  |
| 12204 | FALSE   | Master Pri | P43590    | Uncharacterized peptidase YFR006W OS=Saccharomyces c      | 3     | 2     | 2     | 2    | 535 | 61.7 | 6.16  | 51    | 2              | metabolic    | cytoplasm   | catalytic     | a Pf00557, i850556 | YFR006W  | YFR006W  | VI   |            |          |            |              |             | 0  | High | 1    |   |     |  |
| 12209 | FALSE   | Master Pri | P53966    | Probable mannosyltransferase KTR5 OS=Saccharomyces ce     | 2     | 1     | 2     | 1    | 522 | 61.7 | 5.73  | 23    | 1              | metabolic    | cytoplasm   | catalytic     | a Pf01793, i855703 | YNL029C  | KTR5     | XIV  |            |          |            |              |             | 0  | High | 1    |   |     |  |
| 12214 | FALSE   | Master Pri | P40413    | T-complex protein 1 subunit epsilon OS=Saccharomyces ce   | 4     | 2     | 2     | 2    | 562 | 61.9 | 5.53  | 58    | 2              | metabolic    | cytoplasm   | nucleotide    | Pf00118, i853527   | YJL064W  | CCT5     | X    | Cooperati  |          |            |              |             | 5  | High | 1    |   |     |  |
| 12221 | FALSE   | Master Pri | P23292    | Casein kinase I homolog 2 OS=Saccharomyces cerevisiae (   | 8     | 3     | 3     | 3    | 546 | 62.0 | 9.07  | 129   | 3              | cell organi  | cytoplasm   | catalytic     | a Pf00069, i855568 | YNL154C  | YCK2     | XIV  |            |          |            | Hippo sign   |             | 2  | High | 1    |   |     |  |
| 12227 | FALSE   | Master Pri | P38628    | Phosphocatalyticglucosamine mutase OS=Saccharomyces ce    | 2     | 1     | 1     | 1    | 557 | 62.2 | 5.91  | 38    | 1              | cell organi  | cytoplasm   | catalytic     | a Pf00408, i856652 | YEL058W  | PCM1     | V    | Synthesis  |          |            | Amino sug    | UDP-N-Ac    | 10 | High | 1    |   |     |  |
| 12232 | FALSE   | Master Pri | P35527    | SWISS-PROT:P35527 Tax_id=9606 Gene_Symbol=KRT9 Ker        | 43    | 21    | 50    | 21   | 623 | 62.1 | 5.3   | 1826  | 21             | cell death,  | cytosol;    | mi structural | Pf00038, i3857     |          | KRT9     | 17   |            |          |            |              |             |    | 0    | High |   |     |  |
| 12237 | FALSE   | Master Pri | B3LJRO    | Folylpolyglutamate synthase OS=Saccharomyces cerevisia    | 2     | 1     | 1     | 1    | 548 | 62.1 | 8.82  | 28    | 1              | metabolic    | cytoplasm   | catalytic     | a Pf02875          |          | SCRG_016 |      |            |          |            |              |             |    | 0    | High | 1 |     |  |
| 12243 | FALSE   | Master Pri | P54838    | Dihydroxyacetone kinase 1 OS=Saccharomyces cerevisiae (   | 20    | 10    | 12    | 11   | 584 | 62.2 | 5.41  | 367   | 11             | metabolic    | cytoplasm   | catalytic     | a Pf02733, i854932 | YML070W  | DAK1     | XIII | Fructose c | Carbon m | Xylulose-n |              |             | 10 | High | 1    |   |     |  |
| 12249 | FALSE   | Master Pri | P38707    | Asparagine-tRNA ligase, cytoplasmic OS=Saccharomyces c    | 22    | 10    | 12    | 10   | 554 | 62.2 | 5.85  | 288   | 10             | metabolic    | cytoplasm   | catalytic     | a Pf00152, i856412 | YHR019C  | DEB1     | VIII |            |          |            | Aminoacy     | Cytoplasm r | 2  | High | 1    |   |     |  |
| 12254 | FALSE   | Master Pri | P13647    | SWISS-PROT:P13647 Tax_id=9606 Gene_Symbol=KRT5 Ker        | 23    | 15    | 23    | 7    | 590 | 62.3 | 7.74  | 729   | 15             | cell death,  | cytoplasm   | catalytic     | a Pf00038, i3852   | ENS0000C | KRT5     | 12   | Formation  |          |            | </td>        |             |    |      |      |   |     |  |
| 12259 | FALSE   | Master Pri | P21264    | Phosphoribosylaminoimidazole carboxylase OS=Saccharor     | 15    | 8     | 10    | 8    | 571 | 62.3 | 7.33  | 215   | 8              | metabolic    | cytoplasm   | catalytic     | a Pf00731, i854295 | YJR028C  | ADE2     | XV   |            |          |            | Metabolic De | Novo E      | 5  | High | 1    |   |     |  |
| 12264 | FALSE   | Master Pri | Q06336    | ADP-ribosylation factor-binding protein GGA1 OS=Sacchar   | 10    | 4     | 4     | 4    | 557 | 62.3 | 5.62  | 77    | 4              | transport    | cytosol;    | Gc protein bi | Pf00790, i851960   | YDR3558W | GGA1     | IV   | TBC/RAB    |          |            |              |             | 4  | High | 1    |   |     |  |
| 12270 | FALSE   | Master Pri | P28240    | Isocitrate lyase OS=Saccharomyces cerevisiae (strain ATCC | 58    | 28    | 66    | 28   | 557 | 62.4 | 6.42  | 2107  | 28             | metabolic    | cytoplasm   | catalytic     | a Pf00463, i856794 | YER065C  | ICL1     | V    |            |          |            | Carbon m     | Principle f | 7  | High | 1    |   |     |  |
| 12276 | FALSE   | Master Pri | Q08977    | Cu(2+) suppressing and bleomycin sensitive protein 1 OS=  | 5     | 3     | 3     | 3    | 551 | 62.7 | 5.12  | 77    | 3              |              | cytoplasm   |               | Pf10303, i855867   | YPL263W  | YPL260W  | XVI  |            |          |            |              |             | 0  | High | 1    |   |     |  |
| 12282 | FALSE   | Master Pri | P30952    | Malate synthase 1 OS=Saccharomyces cerevisiae (strain AI  | 49    | 29    | 58    | 29   | 554 | 62.8 | 7.18  | 1337  | 29             | metabolic    | cytoplasm   | catalytic     | a Pf01274, i855606 | YNL117W  | MLS1     | XVI  |            |          |            | Carbon m     | Principle f | 7  | High | 1    |   |     |  |
| 12287 | FALSE   | Master Pri | P39522    | Dihydroxy-acid dehydratase, mitochondrial OS=Saccharom    | 8     | 3     | 3     | 3    | 585 | 62.8 | 7.83  | 62    | 3              | metabolic    | mitochondr  | catalytic     | a Pf00920, i853473 | YJL016C  | ILV3     | X    |            |          |            | Metabolic    | isoleucine  | 11 | High | 1    |   |     |  |
| 12292 | FALSE   | Master Pri | P37012    | Phosphoglucumutase 2 OS=Saccharomyces cerevisiae (str     | 31    | 16    | 32    | 14   | 569 | 63   | 6.62  | 1001  | 16             | cellular hc  | cytoplasm   | catalytic     | a Pf00408, i855131 | YMR105C  | PGM2     | XIII | Galactose  |          |            | Pentose p    | Starch anc  | 24 | High | 1    |   |     |  |
| 12297 | FALSE   | Master Pri | Q04636    | FACT complex subunit POB3 OS=Saccharomyces cerevisiae     | 3     | 3     | 3     | 3    | 552 | 63   | 4.86  | 63    | 3              | cell organi  | chromoso    | DNA bindi     | Pf00531, i854933   | YML069W  | POB3     | XIII | TP53 Regu  |          |            |              |             | 8  | High | 1    |   |     |  |
| 12302 | FALSE   | Master Pri | P23287    | Serine/threonine-protein phosphatase 2B catalytic subuni  | 2     | 1     | 1     | 1    | 553 | 63   | 6.67  | 31    | 1              | cell divisio | cytoplasm   | catalytic     | a Pf00149, i851153 | YLR433C  | CNA1     | XII  |            |          |            |              |             | 0  | High |      |   |     |  |
